# Supplementary material
Source: PubMed Central journal article supplement (PMC7591864)
Supplement: mmc1.pdf [file mmc1.pdf]

## Characteristics of Cardiac Injury in Critically Ill Patients With Coronavirus Disease 2019

*Denis Doyen, MD; Pierre Dupland, MD; Lucas Morand, MD; Etienne Fourrier, MD; Clément Saccheri, MD; Matthieu Buscot, MD; Hervé Hyvernât, MD; Emile Ferrari, MD; Gilles Bernardin, MD; Alain Cariou, MD, PhD; Jean-Paul Mira, MD, PhD; Matthieu Jamme, MD; Jean Dellamonica, MD, PhD; and Mathieu Jozwiak, MD, PhD*

CHEST 2021; 159(5):1974-1985

*Online supplements are not copyedited prior to posting and the author(s) take full responsibility for the accuracy of all data.*

© 2021 AMERICAN COLLEGE OF CHEST PHYSICIANS. Reproduction of this article is prohibited without written permission from the American College of Chest Physicians. See online for more details. DOI: 10.1016/j.chest.2020.10.056

## e-Appendix 1.

### Supplemental Material

#### e-Methods

#### Electrocardiogram analyses and echocardiographic measurements

Electrocardiogram (ECG) signs of right ventricular (RV) strain were defined by T waves inversion in leads V1-V4, a QR pattern in V1, a S1Q3T3 pattern, or incomplete or complete right bundle branch.<sup>1</sup> ECG signs of left ventricular (LV) hypertrophy were defined by (i) a Sokolow–Lyon index  $>35$  mm, (ii) a R in aVL  $>11$  mm, (iii) a Cornell voltage duration product  $>2440$  mm.ms, or (iv) a Cornell voltage  $>28$  mm in men or  $>20$  mm in women.<sup>2</sup>

All transthoracic echocardiography measurements were performed with a Philips CX 50 (Philips Healthcare, DA Best, The Netherlands) or a Vivid E9 (GE Healthcare, Horten, Norway). All measurements were averaged on three consecutive end-expiratory measurements in patients with sinus rhythm and five consecutive end-expiratory measurements in patients with atrial fibrillation.<sup>3</sup> All contours were hand-drawn.

Long-axis and short-axis parasternal views as well as apical five, four, three and two-chamber views were recorded. From the apical five- and four-chamber views, we measured: the left atrial area, the early (E) and atrial (A) peak velocities of the mitral flow with pulsed Doppler, the early diastolic ( $e'$ ) peak velocity of the lateral and septal mitral annulus with Tissue Doppler Imaging, the tricuspid annular plane systolic excursion, the systolic tricuspid annular velocity with Tissue Doppler Imaging, the tricuspid regurgitant jet velocity and the LV and RV end-diastolic areas (LVEDA and RVEDA). From these variables, we calculated  $e'$  averaged, the E/A, E/ $e'$  and RVEDA/LVEDA ratios. RV dilation was defined by a RVEDA/LVEDA ratio  $>0.6$ . The LV ejection fraction and left atrial volume were calculated by the modified Simpson's rule. The systolic pulmonary artery pressure was estimated from the tricuspid regurgitant jet velocity. The LV mass was estimated from LV linear dimensions acquired from 2D long-axis parasternal view as recommended. LV hypertrophy was defined by a LV mass  $>95$  g/m<sup>2</sup> in women and  $>115$  g/m<sup>2</sup> in men.<sup>4</sup>

## e-References

1. Konstantinides SV, Meyer G. The 2019 ESC Guidelines on the Diagnosis and Management of Acute Pulmonary Embolism. *Eur Heart J*. 2019;40(42):3453-3455.
2. Williams B, Mancia G, Spiering W, et al. 2018 ESC/ESH Guidelines for the management of arterial hypertension. *Eur Heart J*. 2018;39(33):3021-3104.
3. Jozwiak M, Mercado P, Teboul JL, et al. What is the lowest change in cardiac output that transthoracic echocardiography can detect? *Crit Care*. 2019;23(1):116.
4. Lang RM, Badano LP, Mor-Avi V, et al. Recommendations for cardiac chamber quantification by echocardiography in adults: an update from the American Society of Echocardiography and the European Association of Cardiovascular Imaging. *Eur Heart J Cardiovasc Imaging*. 2015;16(3):233-270.

**e-Figure 1**

Cumulative incidence of cardiac injury (panel A) and of the different electrocardiographic and echocardiographic abnormalities (panel B-G) in the whole population (n=43) within the first 14 days of intensive care unit stay. ECG: electrocardiogram; LV: left ventricular; RV: right ventricular TTE: transthoracic echocardiography.

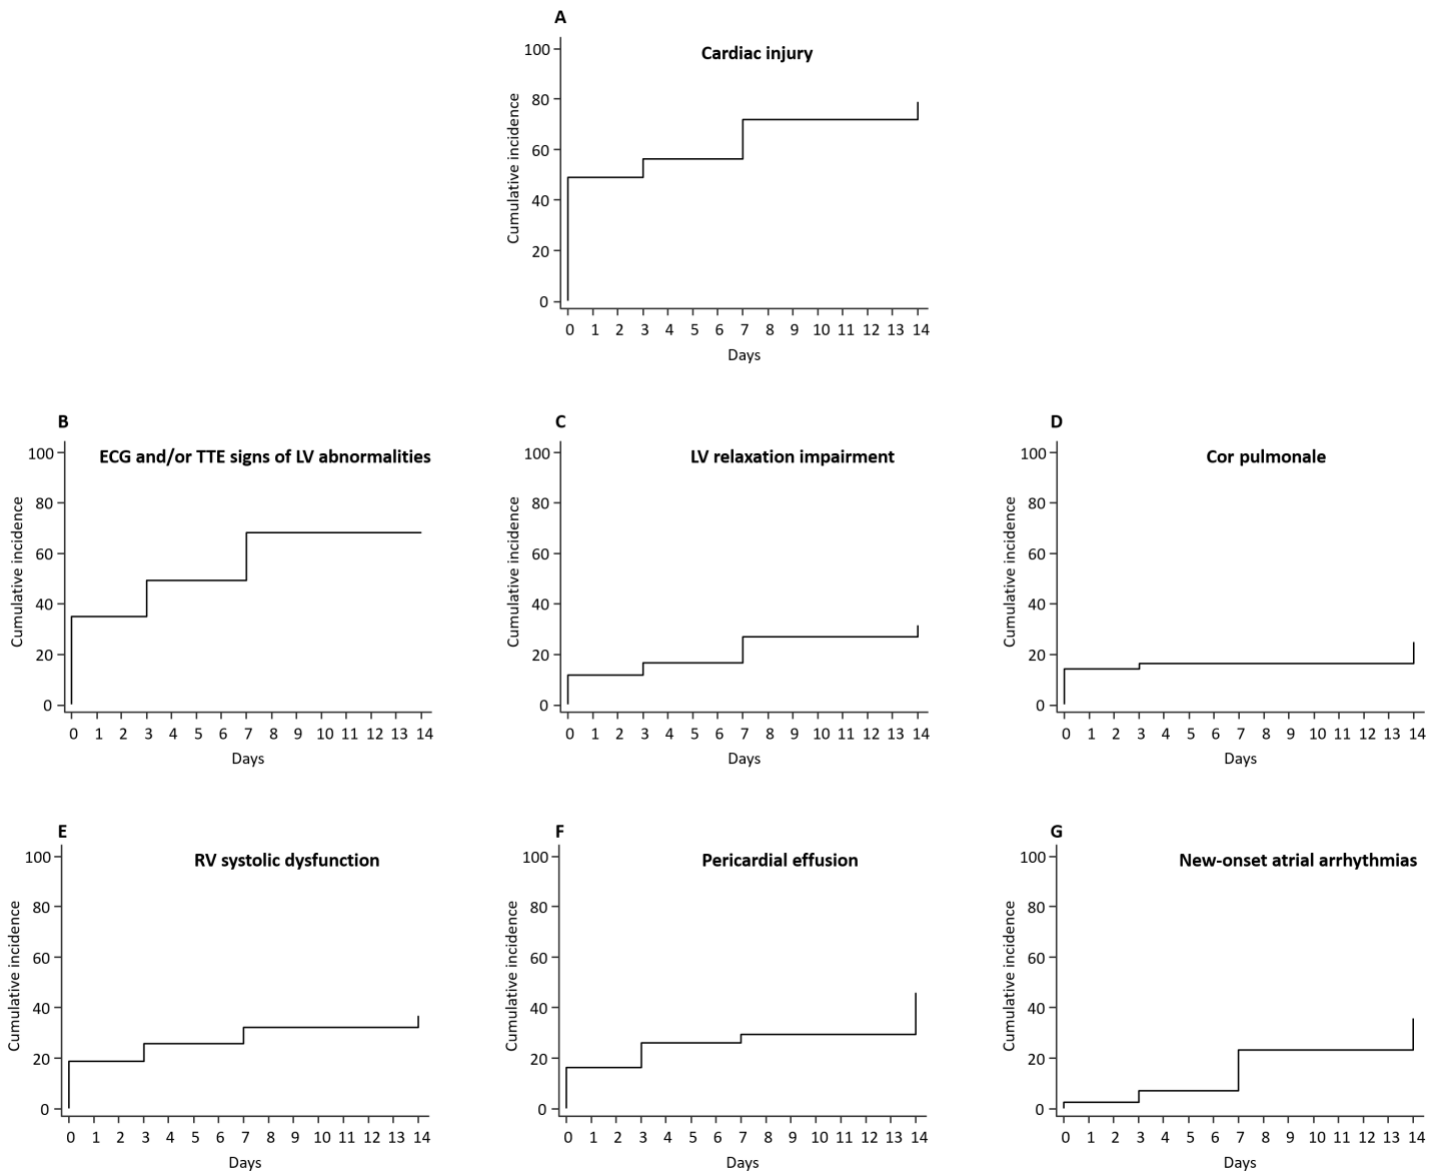

**e-Figure 2**

Twelve-lead electrocardiogram of patient 31: rapid atrial fibrillation.

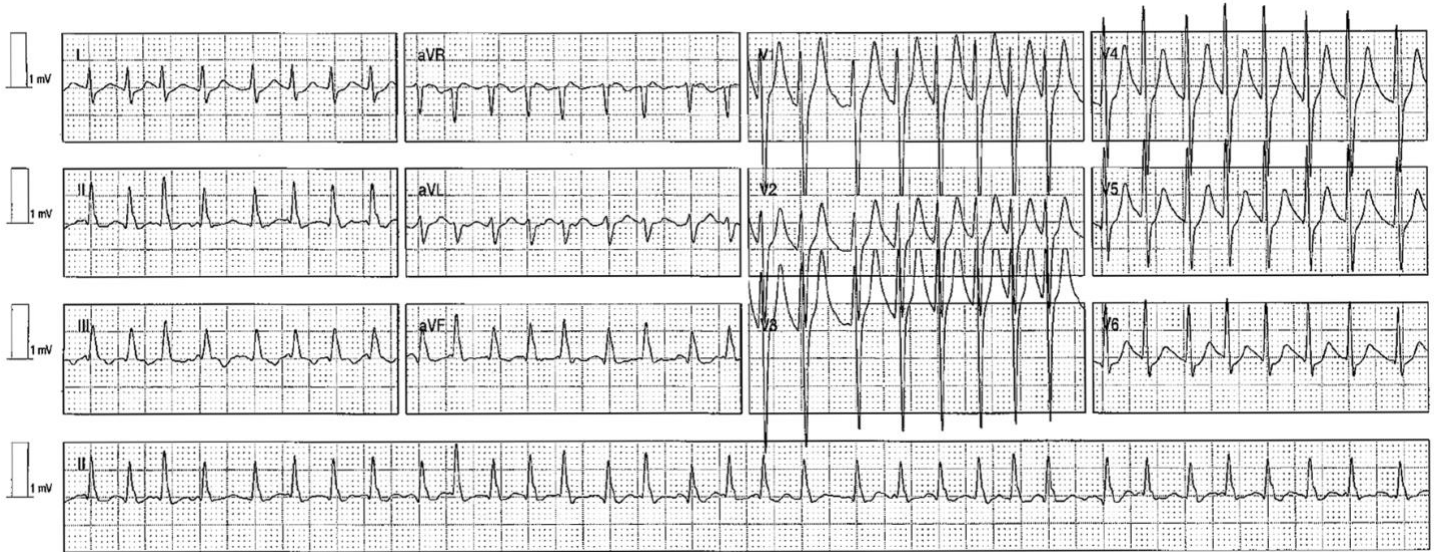

**e-Figure 3**

Twelve-lead electrocardiogram of patient 8 with confirmed pulmonary embolism: sinus tachycardia, complete right-bundle branch and S1Q3T3 pattern suggestive of right ventricular strain.

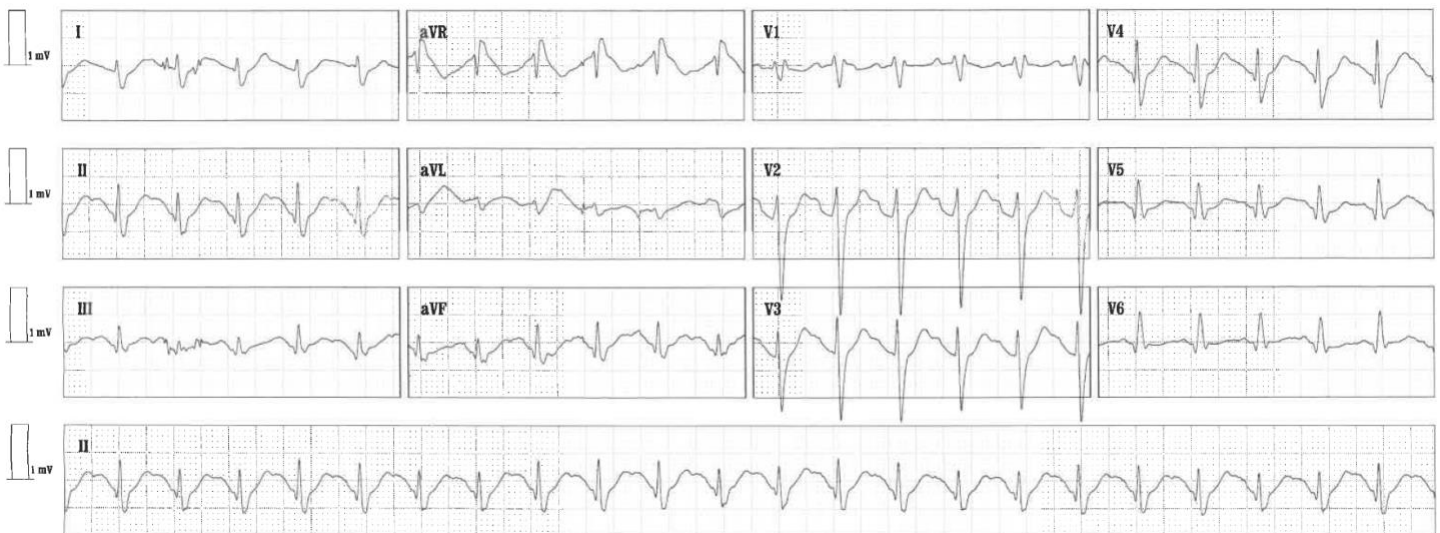

**e-Figure 4**

Twelve-lead electrocardiogram of patient 9 with confirmed significant lesion of the left anterior descending coronary artery: anterior inverted T waves (arrows) suggestive of acute coronary syndrome (non-ST segment elevation myocardial infarction).

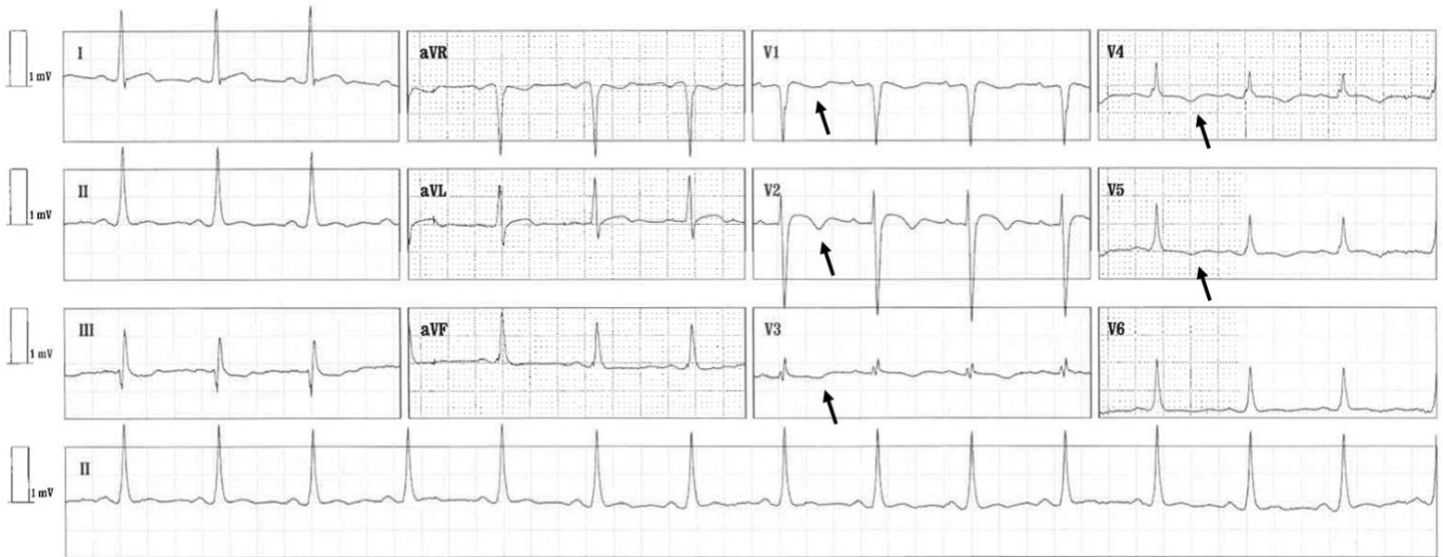

Videos legends

**Video 1**

Transthoracic echocardiography (four-chamber view) of patient 31: left (decreased left ventricular ejection fraction) and right (decreased tricuspid annular systolic plane excursion at 9 mm) ventricular systolic dysfunction induced by rapid atrial fibrillation.

**Video 2**

Transthoracic echocardiography (four-chamber view) of patient 8 with confirmed pulmonary embolism: right ventricular dysfunction (decreased tricuspid annular systolic plane excursion (12 mm)) and dilation associated with pericardial effusion.

**Video 3**

Transthoracic echocardiography (parasternal long axis view) of patient 9 with confirmed significant lesion of the left anterior descending coronary artery: septal and apical hypokinesia suggestive of acute coronary syndrome (non-ST segment elevation myocardial infarction) and pericardial effusion.
